# Supplementary material for: Proteomic and Transcriptomic Analysis of Microviridae φX174 Infection Reveals Broad Upregulation of Host Escherichia coli Membrane Damage and Heat Shock Responses
Source: PubMed Central journal article supplement (PMC8125068; doi:10.1128/msystems.00046-21), 2021-05-11

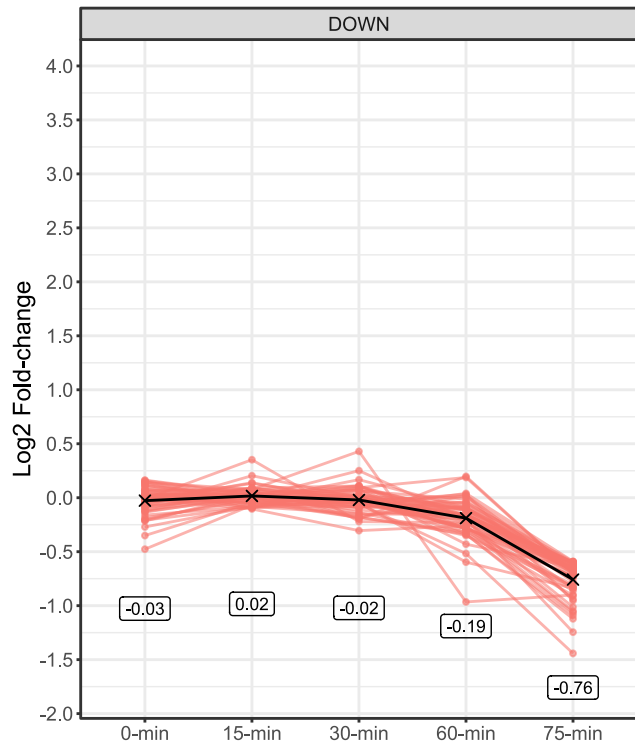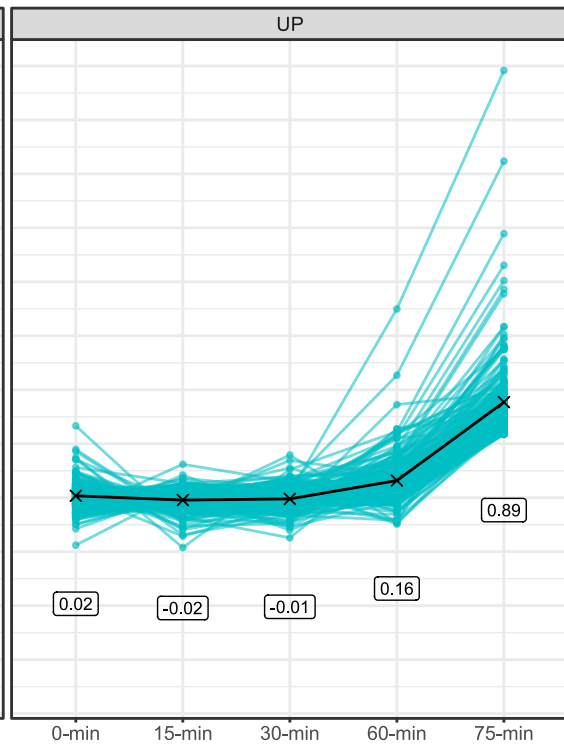

Supplement: mSystems.00046-21-sf005.pdf [file mSystems.00046-21-sf005.pdf]
